# Supplementary material for: Seipin is required for converting nascent to mature lipid droplets
Source: eLife journal article supplement (doi:10.7554/elife.16582), 2016-08-26
Supplement: supp [file elife-16582-supp-v1.zip]

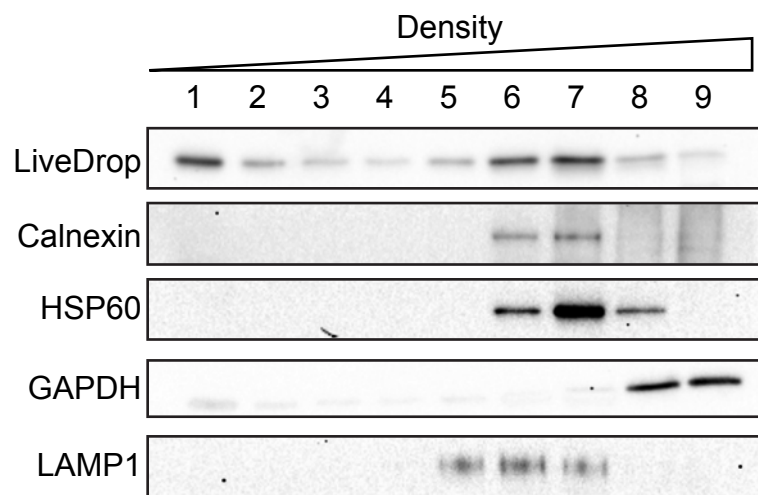

**Figure 2 - figure supplement 2.** *LiveDrop* is present in the LD fraction. SUM159 seipin KO cells transfected with Cherry-*LiveDrop* were fractionated by density centrifugation and protein enrichment in each fraction was determined by Western blot. Cherry-*LiveDrop* is enriched in the LD fraction.
