# Supplementary material for: Seipin is required for converting nascent to mature lipid droplets
Source: eLife journal article supplement (doi:10.7554/elife.16582), 2016-08-26
Supplement: supp [file elife-16582-supp-v1.zip]

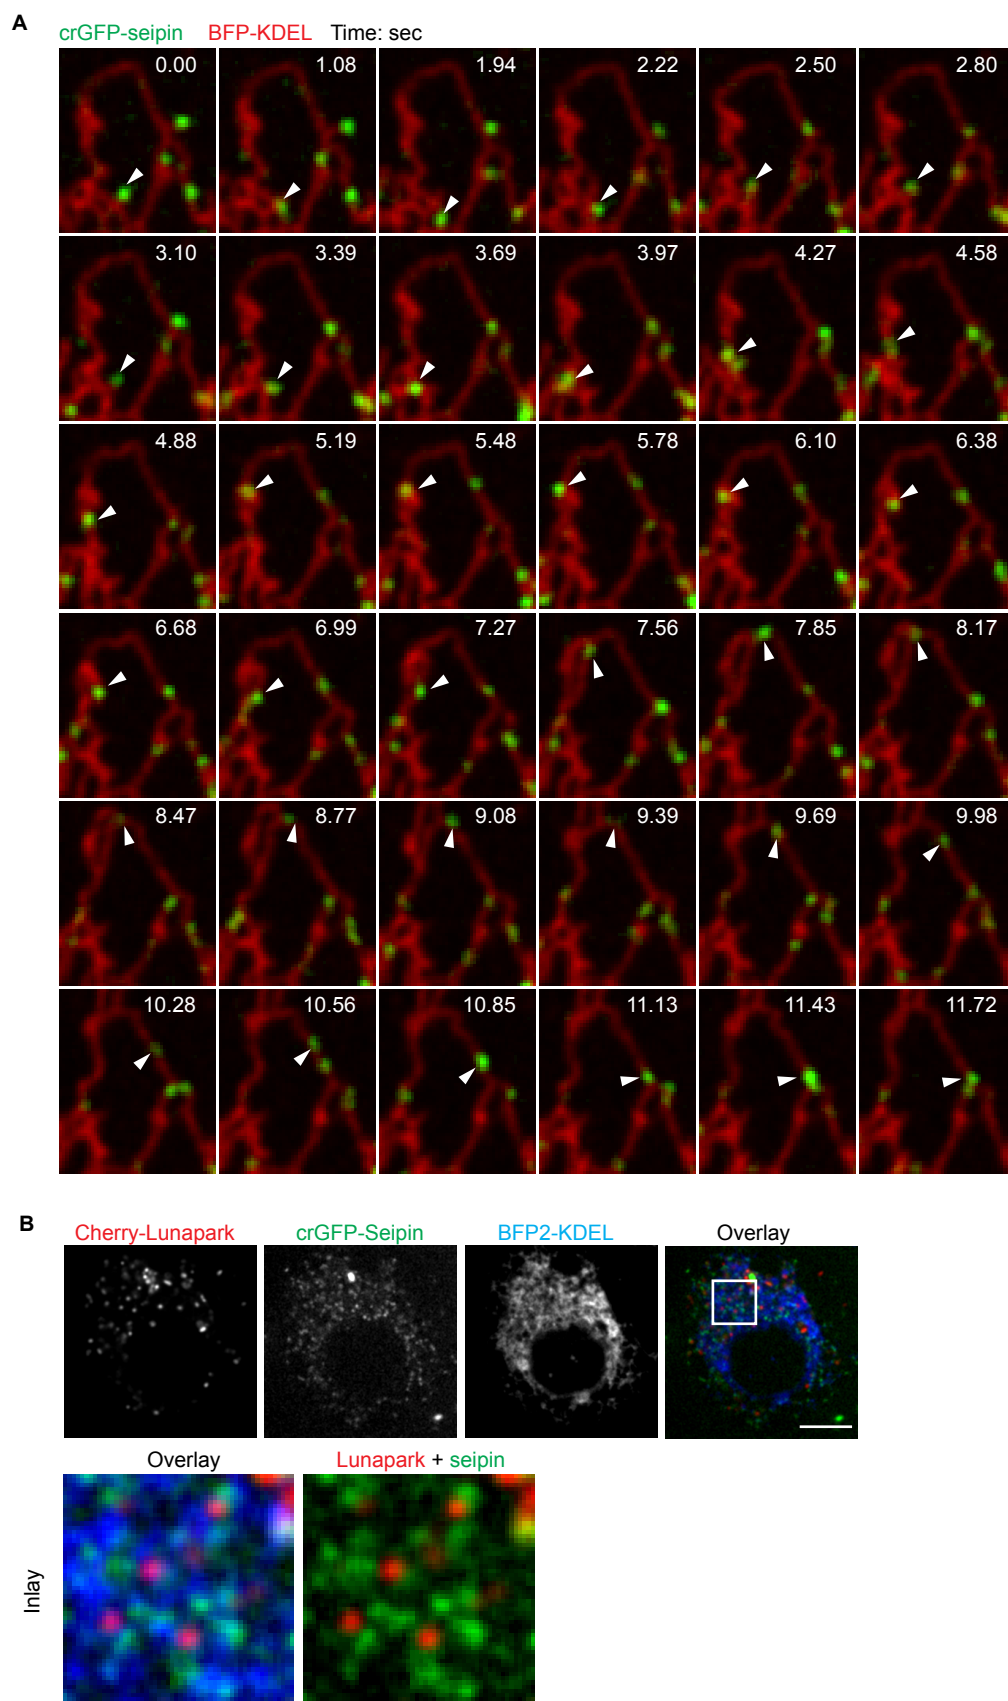

**Figure 6 - figure supplement 1.** Seipin foci are localized in the ER but not at specific ER domains. **(A)** crGFP-seipin (green) cells expressing BFP-KDEL (red) were imaged as described in Figure 3A. A montage of frames is shown. Seipin can be found at tubules (e.g., 9.98 and 10.56 sec), junctions (e.g., 3.69 and 7.56 sec), and tips (e.g., 0.00 and 2.50 sec). Arrowhead follows the movement of a single seipin focus overtime. **(B)** crGFP-seipin does not specifically localize at three-way junctions of the ER. crGFP-seipin cell line expressing cherry-lunapark, a marker for ER three-way junction, and BFP-KDEL, an ER marker, were imaged without fixation. crGFP-seipin does not colocalize with lunapark.
